# Supplementary material for: Hearing Their Voices: Engaging Certified Peer Specialists in Dialogues About Racism and Recovery
Source: Atypon-hosted journal article supplement (doi:10.1176/appi.ps.20220146), 2022-11-23
Supplement: appi.ps.20220146.ds001.pdf [file appi.ps.20220146.ds001.pdf]

**Supplemental Table 1. Description of the Racism and Recovery series events**

| Event                                                                       | Description                                                                                                                                                                                                                                                                                                                                                                      | Participant comments                                                                                                                                                                                                                                                                         |
|-----------------------------------------------------------------------------|----------------------------------------------------------------------------------------------------------------------------------------------------------------------------------------------------------------------------------------------------------------------------------------------------------------------------------------------------------------------------------|----------------------------------------------------------------------------------------------------------------------------------------------------------------------------------------------------------------------------------------------------------------------------------------------|
| Hearing the Truth about Racism in Recovery: A Listening Session             | <p>This Listening Session aimed to provide space for CPS and other mental health providers to share ways in which they have experienced and/or witnessed racism in the behavioral health system,</p> <p>Participants’ experiences were elicited through polls, comments entered into the Zoom chat, small group discussions in breakout rooms, and a large group discussion.</p> | <p>“Being able to share my lived experience on the topic of racism...made me feel visible, heard, and like my experiences are valid and that they matter.”</p>                                                                                                                               |
| Race and Recovery in the Peer Support Workforce                             | <p>Facilitators shared the findings from the Listening Session. Topics discussed included how racism impacts recovery supports in the community and the behavioral health system; about how racism creates barriers to recovery and wellness; and actions peer support providers can take to identify and remedy these barriers.</p>                                             | <p>“It is helpful to begin the conversations on racism in behavioral health. There are issues that are like an elephant in the room that we have not talked about.”</p> <p>“The training gave ideas on how to discuss the issue of race and how peer groups can be of great assistance.”</p> |
| Continuing Conversations 1: Race and Recovery in the Peer Support Workforce | <p>Discussion in this session further explored topics from the listening session and steps to improve recovery and wellness outcomes in communities.</p>                                                                                                                                                                                                                         | <p>“Increased awareness of how and where racial discrimination impacts peer support and recovery so I can check my own behavior and advocate for change in the other areas.”</p>                                                                                                             |
| Continuing Conversations 2: Race and Recovery in the Peer Support Workforce | <p>Leaders from two state departments of mental health shared the actions their agencies are taking to deal with racism in the behavioral health system.</p>                                                                                                                                                                                                                     | <p>“It let me know that we as peers have a voice and we can all be heard.”</p>                                                                                                                                                                                                               |
| Continuing Conversations 3: Race and Recovery in the Peer Support Workforce | <p>Discussion in this session centered on the relationship between physical health and mental health, and how health disparities impact recovery and wellness.</p>                                                                                                                                                                                                               | <p>“Seeing the statistics relating to the effect of the coronavirus on persons of color compared to others was eye-opening. Also, being reminded of the factors that create difficulties for persons of color, such as socioeconomic vulnerabilities and neighborhood stress.”</p>           |

**Online supplement for 10.1176/appi.ps.20220146**

|                                                                                                        |                                                                                                       |                                                                                                                                                                                                                                                                                                           |
|--------------------------------------------------------------------------------------------------------|-------------------------------------------------------------------------------------------------------|-----------------------------------------------------------------------------------------------------------------------------------------------------------------------------------------------------------------------------------------------------------------------------------------------------------|
| <p>Continuing<br/>Conversations 4:<br/>Race and<br/>Recovery in the<br/>Peer Support<br/>Workforce</p> | <p>Discussion in this session focused on resiliency to face racism in the peer support workforce.</p> | <p>“Ongoing conversations about racial equity will always be a topic to weave into the work. Always.”</p> <p>“The part about learning how to listen to people was a huge factor for me. I sometimes have trouble with that and I think that was most helpful in supporting my work responsibilities.”</p> |
|--------------------------------------------------------------------------------------------------------|-------------------------------------------------------------------------------------------------------|-----------------------------------------------------------------------------------------------------------------------------------------------------------------------------------------------------------------------------------------------------------------------------------------------------------|

**Supplemental Table 2. Demographic characteristics of participants in the Racism and Recovery events who responded to the post-event surveys**

|                                           | Hearing the Truth about Racism in Recovery: A Listening Session |               | Race and Recovery in the Peer Support Workforce Webinar |               | Continuing Conversations: Race and Recovery in the Peer Support Workforce (4 sessions combined) |               |
|-------------------------------------------|-----------------------------------------------------------------|---------------|---------------------------------------------------------|---------------|-------------------------------------------------------------------------------------------------|---------------|
|                                           | N                                                               | Response Rate | N                                                       | Response Rate | N                                                                                               | Response Rate |
| Total participants                        | 31                                                              | -             | 162                                                     | -             | 163                                                                                             | -             |
| Responses to the GPRA survey              | 29                                                              | 94%           | 107                                                     | 66%           | 103                                                                                             | 63%           |
| Responses to the Qualtrics survey         | 21                                                              | 68%           | 95                                                      | 59%           | 97                                                                                              | 60%           |
| <b>Gender</b>                             | Frequency                                                       | Percentage    | Frequency                                               | Percentage    | Frequency                                                                                       | Percentage    |
| Female                                    | 6                                                               | 20.7          | 33                                                      | 30.6          | 34                                                                                              | 33            |
| Male                                      | 23                                                              | 79.3          | 67                                                      | 62            | 68                                                                                              | 66            |
| Transgender                               | 0                                                               | 0             | 3                                                       | 2.8           | 1                                                                                               | 1             |
| None of those                             | 0                                                               | 0             | 1                                                       | 0.9           | 0                                                                                               | 0             |
| Not answered                              | 0                                                               | 0             | 4                                                       | 3.7           | 0                                                                                               | 0             |
| <b>Race/Ethnicity</b>                     | Frequency                                                       | Percentage    | Frequency                                               | Percentage    | Frequency                                                                                       | Percentage    |
| American Indian or Alaska Native          | 0                                                               | 0             | 2                                                       | 1.9           | 0                                                                                               | 0             |
| Asian                                     | 0                                                               | 0             | 4                                                       | 3.7           | 0                                                                                               | 0             |
| Black or African American                 | 7                                                               | 24.1          | 38                                                      | 35.2          | 37                                                                                              | 35.9          |
| Hispanic or Latino                        | 0                                                               | 0             | 8                                                       | 7.4           | 13                                                                                              | 12.6          |
| Native Hawaiian or Other Pacific Islander | 0                                                               | 0             | 1                                                       | 0.9           | 0                                                                                               | 0             |
| White                                     | 22                                                              | 75.9          | 52                                                      | 48.1          | 53                                                                                              | 51.5          |
| Not answered                              | 0                                                               | 0             | 3                                                       | 2.8           | 0                                                                                               | 0             |
| <b>Highest degree received</b>            | Frequency                                                       | Percentage    | Frequency                                               | Percentage    | Frequency                                                                                       | Percentage    |
| High school diploma or equivalent (GED)   | 0                                                               | 0             | 3                                                       | 2.8           | 6                                                                                               | 5.8           |
| Some college, but no degree               | 7                                                               | 24.1          | 20                                                      | 18.5          | 23                                                                                              | 22.3          |
| Associate's degree                        | 1                                                               | 3.4           | 12                                                      | 11.1          | 10                                                                                              | 9.7           |
| Bachelor's degree                         | 8                                                               | 27.6          | 32                                                      | 29.6          | 37                                                                                              | 35.9          |
| Master's degree                           | 12                                                              | 41.4          | 31                                                      | 28.7          | 19                                                                                              | 18.4          |
| Doctoral degree                           | 0                                                               | 0             | 5                                                       | 4.6           | 3                                                                                               | 2.9           |
| Other                                     | 1                                                               | 3.4           | 2                                                       | 1.9           | 5                                                                                               | 4.9           |
| Not answered                              | 0                                                               | 0             | 3                                                       | 2.8           | 0                                                                                               | 0             |

Online supplement for 10.1176/appi.ps.20220146

| <b>Primary profession</b>                                            | Frequency | Percentage | Frequency | Percentage | Frequency | Percentage |
|----------------------------------------------------------------------|-----------|------------|-----------|------------|-----------|------------|
| Counselor                                                            | 2         | 6.9        | 9         | 8.3        | 7         | 6.8        |
| Addictions professional                                              | 2         | 6.9        | 7         | 6.5        | 2         | 1.9        |
| Psychologist                                                         | 0         | 0          | 1         | 0.9        | 1         | 1          |
| Social worker                                                        | 4         | 13.8       | 16        | 14.8       | 6         | 5.8        |
| Recovery specialist                                                  | 3         | 10.3       | 12        | 11.1       | 10        | 9.7        |
| Peer professional                                                    | 8         | 27.6       | 27        | 25         | 42        | 40.8       |
| Community health worker                                              | 0         | 0          | 4         | 3.7        | 4         | 3.9        |
| Educator                                                             | 3         | 10.3       | 2         | 1.9        | 1         | 1          |
| Researcher                                                           | 0         | 0          | 1         | 0.9        | 1         | 1          |
| Nurse                                                                | 0         | 0          | 2         | 1.9        | 0         | 0          |
| Student                                                              | 0         | 0          | 0         | 0          | 3         | 2.9        |
| Other                                                                | 5         | 17.2       | 19        | 17.6       | 22        | 21.4       |
| Not answered                                                         | 1         | 3.4        | 3         | 2.8        | 0         | 0          |
| <b>Principle employment setting</b>                                  | Frequency | Percentage | Frequency | Percentage | Frequency | Percentage |
| Substance use disorder treatment or prevention program               | 3         | 10.3       | 7         | 10.2       | 15        | 14.6       |
| Community recovery support program                                   | 5         | 17.2       | 15        | 13.9       | 7         | 6.8        |
| Group home or transitional/supported living facility                 | 0         | 0          | 2         | 1.9        | 2         | 1.9        |
| Mental health clinic or treatment program                            | 6         | 20.7       | 27        | 25         | 25        | 24.3       |
| Community health                                                     | 1         | 3.4        | 8         | 7.4        | 7         | 6.8        |
| Primary care                                                         | 0         | 0          | 2         | 1.9        | 0         | 0          |
| Solo or group practice                                               | 0         | 0          | 1         | 0.9        | 4         | 3.9        |
| Hospital                                                             | 1         | 3.4        | 6         | 5.6        | 0         | 0          |
| State psychiatric hospital                                           | 0         | 0          | 2         | 1.9        | 1         | 1          |
| Criminal justice/corrections (court, prison, jail, prison/probation) | 1         | 3.4        | 3         | 2.8        | 0         | 0          |
| Military or Veterans Affairs                                         | 0         | 0          | 1         | 0.9        | 4         | 3.9        |
| Education settings (elementary, secondary, or higher education)      | 3         | 10.3       | 5         | 4.6        | 5         | 4.6        |

**Online supplement for 10.1176/appi.ps.20220146**

|                              |   |      |    |     |    |      |
|------------------------------|---|------|----|-----|----|------|
| Community-based organization | 4 | 13.8 | 6  | 5.6 | 5  | 4.9  |
| Community coalition          | 0 | 0    | 2  | 1.9 | 4  | 3.9  |
| Other                        | 3 | 10.3 | 14 | 13  | 23 | 22.3 |
| Not answered                 | 2 | 6.9  | 3  | 2.8 | 1  | 1    |

Abbreviations: GED - General Educational Development Test; GPRA – Government Performance and Results Act
